# Supplementary material for: Ngn1 inhibits astrogliogenesis through induction of miR-9 during neuronal fate specification
Source: eLife journal article supplement (doi:10.7554/elife.06885), 2015-08-13
Supplement: supp [file elife_poa_e06885_Supplementary_file_1.doc]

**Figure Supplements**

**Figure Legends**

**Figure 2-figure supplement 1. a.** Upper left panels showed construction of miR-9 overexpression plasmid (miR-9) by inserting pre-miR-9-2 and its flanking sequences to a modified lentiviral plasmid FG12. Lower left panels showed the construction of miR-9 knockdown lentiviral vector (miR-9AS) and knockdown control (miR-9ASm). Four miR-9 bulged antisense sequences were inserted immediately downstream of the H1 promoter of the modified-FG12 vector. H1, H1 promoter. UbiC, ubiquitin promoter. miR-9AS mutant control, miR-9Sm was constructed by modifying 3-nt in miR-9 seed binding region. Right panels showed the luciferase assay of miR-9 knockdown efficiency. Upper right panel showed the construction of miR-9 luciferase assay plasmid. Three miR-9 bulged antisense repeats were inserted immediately downstream of a firefly luciferase gene. Lower right panel showed relative fold changes of luciferase activity. miR-9 luciferase construct was co-transfected into HEK239T cells with miR-9 and/or miR-9AS. A Renilla luciferase plasmid pRL-TK was used as an internal control. The empty vector FG12 (con) and the miR-9 binding site mutant miR-9AS (miR-9ASm) were used as negative controls. *, p<0.05, Wilcoxon-Mann-Whitney test. **b.** Endogenous miR-9 was expressed in neocortical neurons, but not in astrocytes in adult cortex. miR-9 in situ hybridization (ISH) combined with Rbfox3 (NeuN) and Gfap double immunostaining in the upper left panels were shown at greater magnification in the right panels. The lower left panels showed miR-9 positive neuron that overlaps with a neuronal maker, Rbfox3 (green, arrowhead), but not Gfap positive astrocyte (red, arrow).

**Figure 3-figure supplement 1. miR-9 and Ngn1 inhibited astrogliogenesis. a.** Transfection of mouse E11 cortical NPCs with exogenous miR-9 duplex significantly reduced the number of Gfap+ astrocytes *in vitro*. **b.** miR-9 suppressed activation of glial-specific *Gfap* promoter, with little effect on the neurogenic promoter Neurod1. **c.** Ngn1 promoted neurogenesis and suppresses astrogliogenesis. Western blotting analysis showed that overexpression of Ngn1 in mouse E11 cortical NPC promoted Tuj1 expression, while reduced Gfap+ expression (left panels). Tuj1, beta III tubulin, a neuronal marker. Right panel showed overexpression of Ngn1 in mouse E11 cortical NPC promoted neurogenesis (Tuj1+ cells).

**Figure 3-figure supplement 2. miR-9 targeted Jak-Stat signaling pathway. a.** Predicted duplex formation between mouse *Lifr-beta*, *Il6st*, and *Jak1* 3’UTR (top) and miR-9 (bottom). **b.** Luciferase activity of wild type *Lifr-beta* 3’UTR and miR-9 binding region mutant Lifr-beta 3’ UTR reporter genes with or without miR-9 duplex in mouse E11 cortical NPCs (*, p<0.0001, Wilcoxon-Mann-Whitney test).  **c, d.** Ngn1 suppressed the expression of three major components of Jak-Stat signaling pathway. **c.** Western blot analysis of Ngn1 suppressed the protein levels of Lifr-beta, Il6st, and Jak1. Actb served as the loading control. **d.** Overexpression of Ngn1 decreased the activity of luciferase reporter fused to 3’UTRs of *Il6st*, *Lifr-beta*, and *Jak1* mRNAs. (*, p<0.05, **, p<0.005, Wilcoxon-Mann-Whitney test).
